# Supplementary material for: A randomized, double-blinded, phase 2 trial of EDP1815, an oral immunomodulatory preparation of Prevotella histicola, in adults with mild-to-moderate plaque psoriasis
Source: Frontiers journal article supplement (doi:10.3389/fmed.2024.1292406), 2024-05-15
Supplement: Data_Sheet_1.pdf [file Data_Sheet_1.pdf]

## MENDELEY SUPPLEMENTAL FIGURES AND TABLES

### Supplementary Appendix

#### Definition of Terms

| Term              | Definition                                                                                                                                                                                                                                                                                                        |
|-------------------|-------------------------------------------------------------------------------------------------------------------------------------------------------------------------------------------------------------------------------------------------------------------------------------------------------------------|
| Partial relapse   | Loss of PASI-50 response after cessation of study treatment                                                                                                                                                                                                                                                       |
| PASI              | Psoriasis Area and Severity Index                                                                                                                                                                                                                                                                                 |
| PASI-50 response  | ≥50% reduction from baseline in PASI                                                                                                                                                                                                                                                                              |
| PASI-75 response  | ≥75% reduction from baseline in PASI                                                                                                                                                                                                                                                                              |
| PASI-90 response  | ≥90% reduction from baseline in PASI                                                                                                                                                                                                                                                                              |
| PASI-100 response | 100% reduction from baseline in PASI                                                                                                                                                                                                                                                                              |
| Rebound           | Increase in PASI to 125% of baseline value or greater, or onset of new pustular/erythrodermic psoriasis on or before the week 28 visit (excluding subjects with 125% increase at the end of treatment: rebound can be only achieved by subjects with the last on-treatment visit PASI less than 125% of baseline) |
| Relapse           | Increase in PASI to baseline value or greater, or participant begins a new treatment for psoriasis                                                                                                                                                                                                                |
| Treatment failure | Initiation of an oral agent, biologic, or intermediate or high-potency topical therapy for psoriasis                                                                                                                                                                                                              |

#### Study Centers and Countries

This study was conducted at 29 study centers in the following 4 countries: United States (8 study centers), United Kingdom (11 study centers), Poland (8 study centers), and Hungary (2 study centers).

#### *Principal Investigators*

##### **Hungary**

Aniko Maria Dobribanne Fekete, AES - DRS - Synexus Zalaegerszeg Magyarország  
Egészségügyi Kft, Zalaegerszeg, Hungary

Mónika Sápy, AES - DRS - Synexus Budapest - Magyarország Egészségügyi  
Szolgáltató Kft, Budapest, Hungary

**Poland**

Ryszard Galus, AES - DRS - Synexus Polska Sp. z o.o. Oddział w Warszawie,  
Warszawa, Poland

Anna Janowicz, AES - DRS - Synexus Polska Sp. z o.o. Oddział w Częstochowie,  
Częstochowa, Poland

Tomasz Kolodziej, AES - DRS - Synexus Polska Sp. z o.o. Oddział we Wrocławiu,  
Wrocław, Poland

Joanna Renczyńska-Matysko, AES - DRS - Synexus Polska Sp. z o.o. Oddział w  
Gdańsku, Gdańsk, Poland

Joanna Sieniawska, AES - DRS - Synexus Polska Sp. Z o.o. Oddział w Łodzi, Łódź,  
Poland

Rafał Sługocki, AES - DRS - Synexus Polska Sp. z o.o. Oddział w Gdyni, Gdynia,  
Poland

Santa Vanaga-Besser, AES - DRS - Synexus Polska Sp. z o.o. Oddział w Katowicach,  
Katowice, Poland

Grażyna Wolnik-Trzeciak, AES - DRS - Synexus Polska Sp. z o.o. Oddział w  
Poznaniu, Poznań, Poland

**United Kingdom**

Marianne Elizabeth Viljoen, AES - DRS - NW Consortium Merseyside, Liverpool,  
United Kingdom

Marianne Elizabeth Viljoen, AES - DRS - AES - DRS - NW Consortium Manchester,  
Manchester, United Kingdom

Marianne Elizabeth Viljoen, AES - DRS - NW Consortium Lancashire, Chorley,  
United Kingdom

Naimat (Naimatullah) Khan, Medicines Evaluation Unit, Manchester, United Kingdom

Kim-Claire Tabner, MAC Clinical Research, Cannock, United Kingdom

Abimbola Babajide, MAC Clinical Research, Lancashire, Blackpool, United Kingdom

Sandra Connell, MAC Clinical Research, Teeside, United Kingdom

Sam Leving, MAC Clinical Research, Leeds, United Kingdom

Imrozia Munsoor, AES - DRS - Synexus Scotland Clinical Research Centre, Lanarkshire, Bellshill, United Kingdom

Hawys Thomas, AES - DRS - Synexus Wales Clinical Research Centre, Cardiff, United Kingdom

Hawys Thomas, AES - DRS - Synexus Thames Valley Clinical Research Centre, Reading, United Kingdom

## **United States**

Benjamin Ehst, Oregon Medical Research Center PC, Portland, Oregon, United States

Kenneth Stein, AES - Synexus Clinical Research US, Inc. - Santa Rosa, Santa Rosa, California, United States

Paul Nugent, AES - DRS - Synexus Clinical Research US, Inc. – Cincinnati, Cincinnati, Ohio, United States

Richard Sturtz, AES - DRS - Synexus Clinical Research US, Inc. – Anderson, Anderson, South Carolina, United States

Jewel White, AES - DRS - Synexus Clinical Research US, Inc. - The Villages, The Villages, Florida, United States

Robert Meyer, AES - DRS - Synexus Clinical Research US, Inc. – Orlando, Orlando, Florida, United States

Seth Forman, ForCare Clinical Research - CenExcel FCR – PPDS, Tampa, Florida, United States

Linda Murray, AES - DRS - Synexus Clinical Research US, Inc. - St. Petersburg, Pinellas Park, Florida, United States

### ***Institutional Review Boards/Ethics Committees***

#### **Hungary**

Medical Research Council Ethics Committee for Clinical Pharmacology, Budapest, Zrínyi u. 3., H-1051, Budapest, Hungary

#### **Poland**

The Ethics Committee at the Regional Chamber of Physicians and Dentists, 80-204 Gdańsk, ul. Śniadeckich 33, Gdansk, Poland

#### **United Kingdom**

Health Research Authority, East Midlands - Nottingham 2 Research Ethics Committee

The Old Chapel, Royal Standard Place, Nottingham, NG1 6FS, United Kingdom

#### **United States**

Advarra, 6940 Columbia Gateway Dr., Suite 110, Columbia, MD 21046, United States

**Additional Parameters Considered in Statistical Analysis**

Sample size (N=225) was calculated to ensure at least 80% power at the 5% 2-sided significance level to detect a difference of 20% between the active and placebo groups within each cohort for percent change in PASI from baseline at week 16. Pooled standard deviation across all doses was assumed to be 25% and the drop-out rate between week 4 and week 16 was assumed to be 15%. The 3 placebo groups were examined for systematic differences between them and as none were found, all placebo groups were pooled for pairwise comparisons between each active dose and placebo.

Response endpoints were analyzed using a frequentist generalized linear mixed model with a logit link. Descriptive statistics were also used to summarize all endpoints by treatment group. All analyses were conducted using SAS software (SAS Institute, Inc, Cary, North Carolina) Version 9.4.

# Mendeley Supplemental Figure 1. Participant Disposition

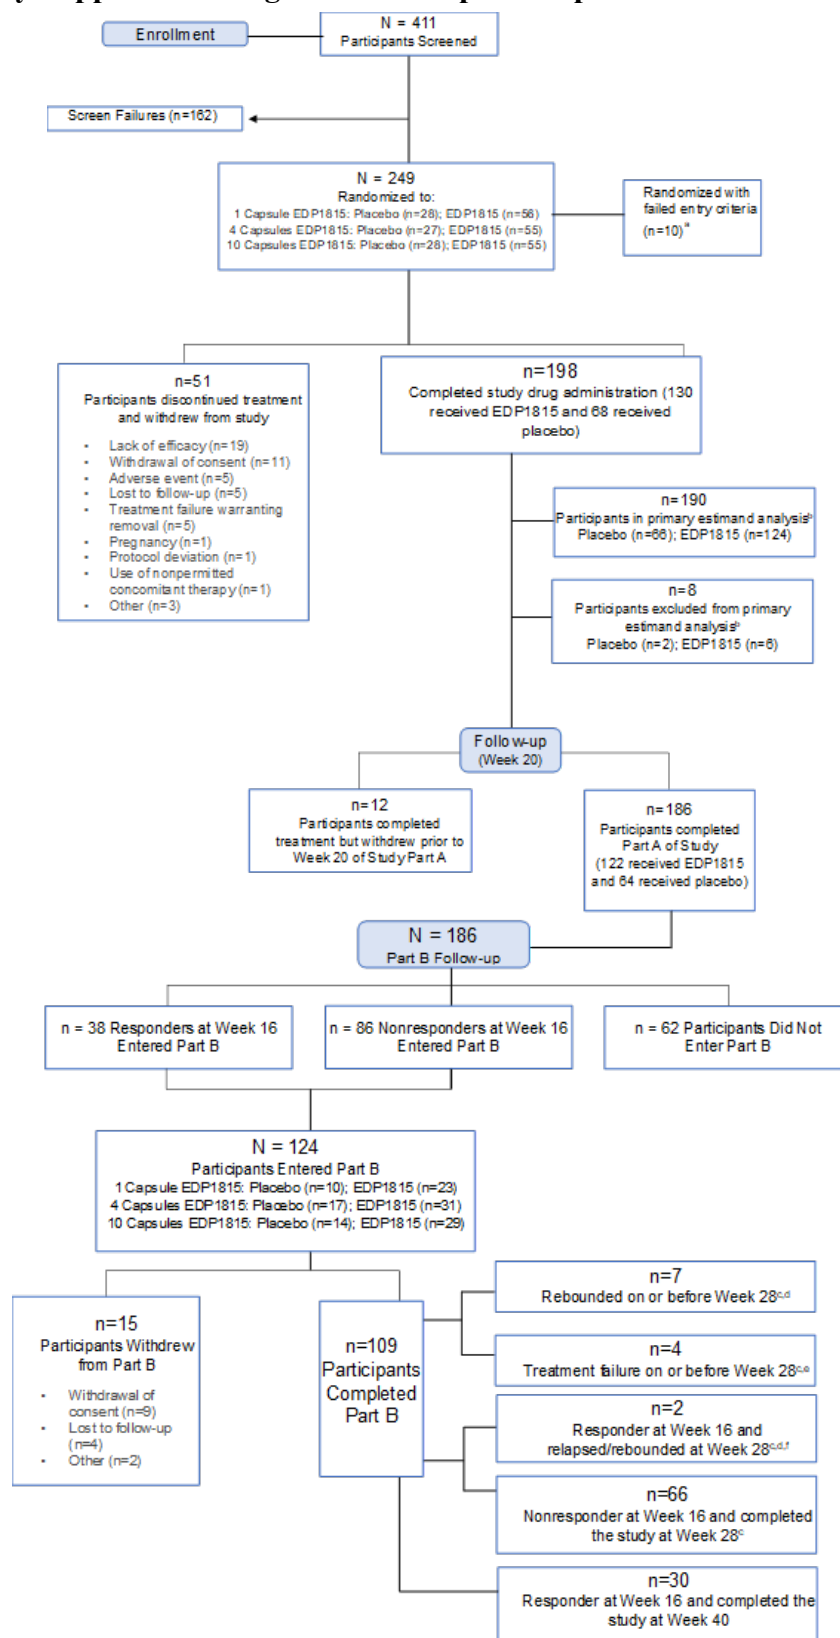

<sup>a</sup>Failed entry criteria for randomized participants included contraception criteria, having received systemic or topical treatment for psoriasis, chronic inflammatory disease, and recent blood donation.

<sup>b</sup>Primary efficacy estimand analysis included participants with week 16 data available within 4 days after end of treatment and excluded those without.

<sup>c</sup>Participants were considered to have completed the study.

<sup>d</sup>Rebound was defined as an increase in PASI to  $\geq 125\%$  of baseline value, or an onset of new pustular/erythrodermic psoriasis, on or before the week 28 visit.

<sup>e</sup>Treatment failure was defined as the initiation of an oral agent, biologic, or intermediate or high-potency topical therapy for psoriasis.

<sup>f</sup>Relapse was defined as an increase in PASI to baseline level or greater, or the start of new psoriasis treatment, on or before week 40.

**Mendeley Supplemental Table I. Summary of Baseline Demographics**

|                                             | <b>All<br/>(n=249)</b> | <b>Pooled<br/>Placebo<br/>(n=83)</b> | <b>1 Capsule<br/>EDP1815<br/>(N=56)<br/>n (%)</b> | <b>4 Capsules<br/>EDP1815<br/>(N=55)<br/>n (%)</b> | <b>10 Capsules<br/>EDP1815<br/>(N=55)<br/>n (%)</b> |
|---------------------------------------------|------------------------|--------------------------------------|---------------------------------------------------|----------------------------------------------------|-----------------------------------------------------|
| Age, mean years                             | 44                     | 44.4                                 | 44.5                                              | 41.2                                               | 45.5                                                |
| Female (%)                                  | 36.9                   | 39.8                                 | 39.3                                              | 43.6                                               | 23.6                                                |
| White (%)                                   | 98.8                   | 99.4                                 | 100                                               | 98.2                                               | 97.6                                                |
| BMI, mean kg/m <sup>2</sup>                 | 29.7                   | 30.2                                 | 29.9                                              | 28.5                                               | 29.7                                                |
| Duration of plaque psoriasis,<br>mean years | 18.6                   | 17.8                                 | 18.6                                              | 18.0                                               | 20.6                                                |
| PGA 2 (%)                                   | 37.8                   | 34.9                                 | 37.5                                              | 45.5                                               | 34.6                                                |
| PGA 3 (%)                                   | 62.2                   | 65.1                                 | 62.5                                              | 54.5                                               | 65.4                                                |
| PASI mean (%)                               | 8.5                    | 8.7                                  | 8.4                                               | 8.7                                                | 8.3                                                 |
| BSA mean (%)                                | 7.3                    | 7.3                                  | 7.4                                               | 7.3                                                | 7.1                                                 |

BMI, body mass index; BSA, body surface area; DLQI, Dermatology Life Quality Index; kg, kilogram; m, meter; PASI, Psoriasis Area and Severity Index; PGA, Physician Global Assessment.



**Mendeley Supplemental Table II. Summary of Key Secondary and Post Hoc Outcomes at Week 16**

|                                                                                                     | Placebo     | 1 Capsule<br>EDP1815 |                                | 4 Capsules<br>EDP1815 |                                | 10 Capsules<br>EDP1815 |                                |
|-----------------------------------------------------------------------------------------------------|-------------|----------------------|--------------------------------|-----------------------|--------------------------------|------------------------|--------------------------------|
|                                                                                                     | Responders  | Responders           | OR vs.<br>Placebo <sup>a</sup> | Responders            | OR vs.<br>Placebo <sup>a</sup> | Responders             | OR vs.<br>Placebo <sup>a</sup> |
| <b>Key Secondary Outcomes</b>                                                                       |             |                      |                                |                       |                                |                        |                                |
| <b>PASI-50, n/N (%)</b>                                                                             | 8/66 (12.1) | 11/37 (29.7)         | 2.64                           | 15/47 (31.9)          | 2.93                           | 10/40 (25.0)           | 1.73                           |
| <b>PASI-75, n/N (%)</b>                                                                             | 2/66 (3.0)  | 2/37 (5.4)           | N/A                            | 4/47 (8.5)            | N/A                            | 4/40 (10.0)            | N/A                            |
| <b>PASI-90, n/N (%)</b>                                                                             | 0/66 (0)    | 0/37 (0)             | N/A                            | 1/47 (2.1)            | N/A                            | 2/40 (5.0)             | N/A                            |
| <b>Achievement of<br/>PGA 0 or 1 with a<br/>≥2-point<br/>improvement from<br/>baseline, n/N (%)</b> | 4/66 (6.1)  | 4/37 (10.8)          | 2.14                           | 5/47 (10.6)           | 1.73                           | 5/40 (12.5)            | 1.89                           |
| <b>Key Post Hoc Outcome</b>                                                                         |             |                      |                                |                       |                                |                        |                                |
| <b>Achievement of<br/>PGA 0 or 1, n/N (%)</b>                                                       | 6/66 (9.1)  | 8/33 (24.3)          | N/A                            | 10/47 (21.3)          | N/A                            | 6/40 (15.0)            | N/A                            |

<sup>a</sup>Odds ratios calculated using a generalized linear mixed model with a logit link. PASI-75 and PASI-90 endpoints were summarized only.

N/A, not available; OR, odds ratio; PASI, Psoriasis Area and Severity Index; PGA, physician's global assessment.

**Mendeley Supplemental Table III. Summary of Related TEAEs Reported by at Least 2% of Participants in Any Treatment Group**

| <b>System Organ Class<br/>Preferred Term</b>  | <b>All<br/>Placebo<br/>(N=83)<br/>n (%), E</b> | <b>1 Capsule<br/>EDP1815<br/>(N=56)<br/>n (%), E</b> | <b>4 Capsules<br/>EDP1815<br/>(N=55)<br/>n (%), E</b> | <b>10 Capsules<br/>EDP1815<br/>(N=55)<br/>n (%), E</b> | <b>All<br/>EDP1815<br/>(N=166)<br/>n (%), E</b> |
|-----------------------------------------------|------------------------------------------------|------------------------------------------------------|-------------------------------------------------------|--------------------------------------------------------|-------------------------------------------------|
| <b>Any related event<sup>a</sup></b>          | 14 (16.9%), 32                                 | 6 (10.7%), 17                                        | 12 (21.8%), 31                                        | 14 (25.5%), 27                                         | 32 (19.3%), 75                                  |
| <b>Nervous system disorders</b>               |                                                |                                                      |                                                       |                                                        |                                                 |
| Headache                                      | 3 (3.6%), 4                                    | 2 (3.6%), 2                                          | 0                                                     | 1 (1.8%), 1                                            | 3 (1.8%), 3                                     |
| <b>Gastrointestinal disorders</b>             |                                                |                                                      |                                                       |                                                        |                                                 |
| Diarrhea                                      | 3 (3.6%), 4                                    | 2 (3.6%), 2                                          | 1 (1.8%), 1                                           | 3 (5.5%), 3                                            | 6 (3.6%), 6                                     |
| Dyspepsia                                     | 2 (2.4%), 2                                    | 0                                                    | 4 (7.3%), 7                                           | 2 (3.6%), 2                                            | 6 (3.6%), 9                                     |
| Abdominal pain                                | 1 (1.2%), 1                                    | 1 (1.8%), 2                                          | 2 (3.6%), 3                                           | 1 (1.8%), 1                                            | 4 (2.4%), 6                                     |
| Flatulence                                    | 0                                              | 0                                                    | 3 (5.5%), 3                                           | 1 (1.8%), 1                                            | 4 (2.4%), 4                                     |
| Nausea                                        | 1 (1.2%), 1                                    | 1 (1.8%), 2                                          | 0                                                     | 2 (3.6%), 2                                            | 3 (1.8%), 4                                     |
| Abdominal distention                          | 1 (1.2%), 2                                    | 0                                                    | 0                                                     | 2 (3.6%), 2                                            | 2 (1.2%), 2                                     |
| <b>Skin and subcutaneous tissue disorders</b> |                                                |                                                      |                                                       |                                                        |                                                 |
| Rash                                          | 0                                              | 1 (1.8%), 1                                          | 0                                                     | 2 (3.6%), 2                                            | 3 (1.8%), 3                                     |
| Pruritus                                      | 4 (4.8%), 5                                    | 0                                                    | 1 (1.8%), 1                                           | 0                                                      | 1 (0.6%), 1                                     |
| <b>Investigations</b>                         |                                                |                                                      |                                                       |                                                        |                                                 |
| C-reactive protein increased                  | 0                                              | 0                                                    | 0                                                     | 2 (3.6%), 2                                            | 2 (1.2%), 2                                     |

<sup>a</sup>Related TEAEs are those with possible, probable, or definite relationship to study drug, or where relationship is missing.

E, events; TEAE, treatment-emergent adverse event.
